# Supplementary material
Source: PubMed Central journal article supplement (PMC10524297)
Supplement: NIHMS1896707-supplement-1.pdf [file NIHMS1896707-supplement-1.pdf]

## **Supplemental Data**

**Table S1:** EVOS FL Color Microscope Light Cube Excitation and Emission

| <b>Light Cube</b>    | <b>Excitation (nm)</b> | <b>Emission (nm)</b> |
|----------------------|------------------------|----------------------|
| DAPI                 | 357/44                 | 447/60               |
| GFP                  | 482/25                 | 524/24               |
| Invitrogen Texas Red | 585/29                 | 628/32               |
| Invitrogen Cy7       | 710/40                 | 809/81               |

**Table S2:** HALO<sup>®</sup> Algorithm Settings – CytoNuclear FL v1.4

|                                    | <b>Parameter Name</b>               | <b>Value</b>  |
|------------------------------------|-------------------------------------|---------------|
| <b>Nuclei<br/>Detection</b>        | Nuclear contrast threshold          | 0.523         |
|                                    | Minimum nuclear intensity           | 0.11          |
|                                    | Minimum nuclear size                | 10            |
|                                    | Maximum nuclear size                | 571.7         |
|                                    | Nuclear segmentation aggressiveness | 0.2           |
|                                    | Minimum nuclear roundness           | 0             |
| <b>Fluorescence<br/>Detections</b> | Maximum cytoplasm radius            | 3             |
|                                    | Stain optical density (Dye 1)       | 0.090 - 0.240 |
|                                    | Stain optical density (Dye 2)       | 0.090 - 0.240 |
|                                    | Stain optical density (Dye 3)       | 0.203 - 0.205 |
